# Supplementary material
Source: Springer Nature journal article supplement (https://www.springermedizin.de/resource/supplementary/12984_2012_450_MOESM7_ESM.pdf/9604636)

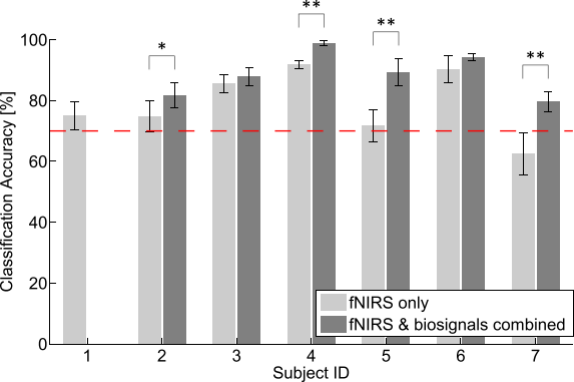

Supplement: MOESM7 [file 9604636]
